# Supplementary material for: The Splitting 660 km Discontinuity Associated with Lithospheric Delamination in the Northern Part of the North-South Seismic Zone, China
Source: Research Square preprint supplement (doi:10.21203/rs.3.rs-1049354/v1), 2021-11-16
Supplement: Supplementary file 1 [file 41a7f1cfba14593d19308916.docx]

**The splitting 660 km discontinuity associated with lithospheric delamination in the northern part of the North-South seismic zone, China**

Chuansong He

*Corresponding author: C.S. He, email:* [*hechuansong@aliyun.com*](mailto:hechuansong@aliyun.com)

*Institute of Geophysics, CEA, Beijing 100081, China*


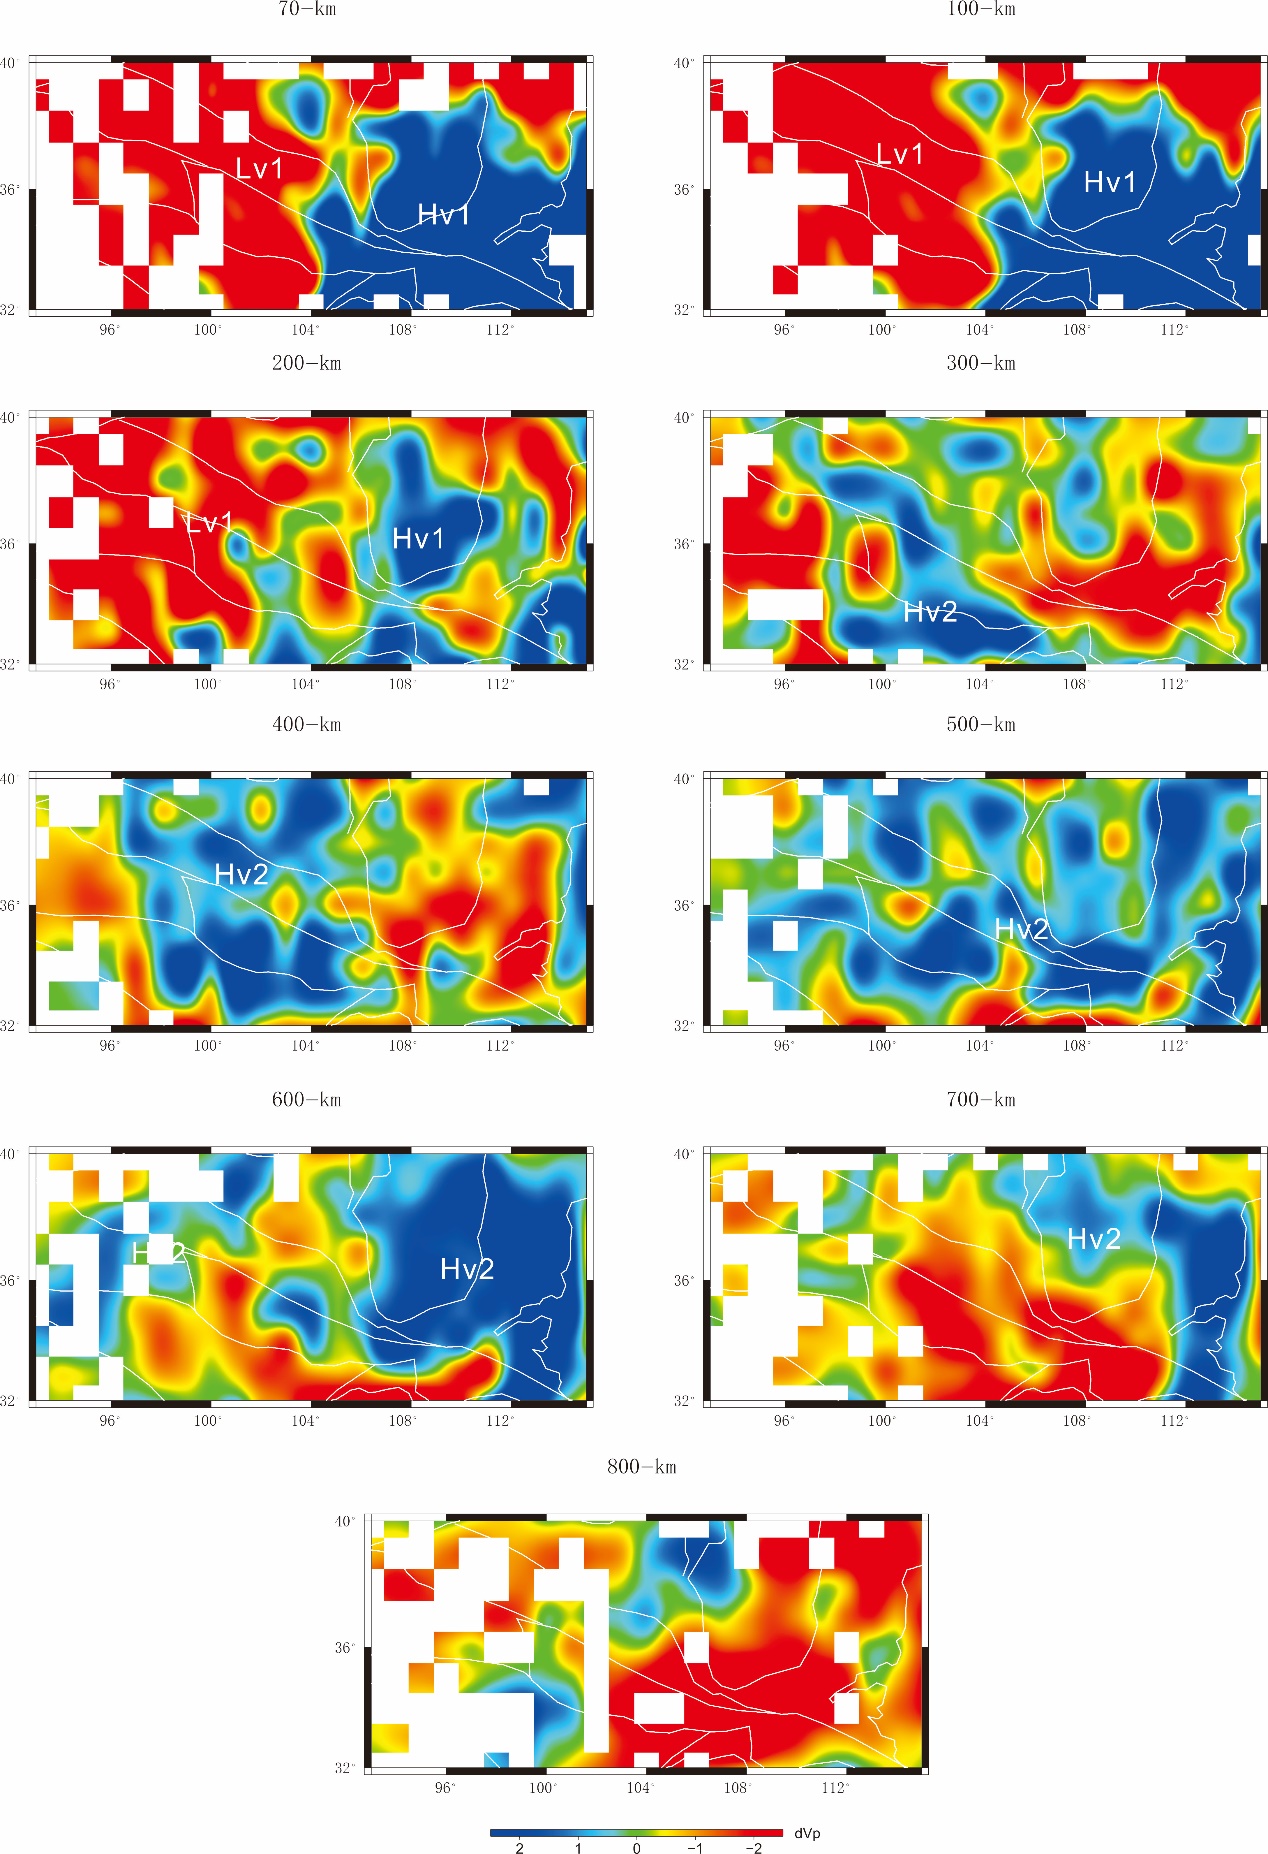


Fig. S1 P-wave velocity perturbation at different depths (He and Santosh, 2017). Portions of the model are not shown where the recovery from the input velocity model is below 20% [the figure was generated by Chuansong He using Generic Mapping Tools (<https://www.generic-mapping-tools.org/>)].


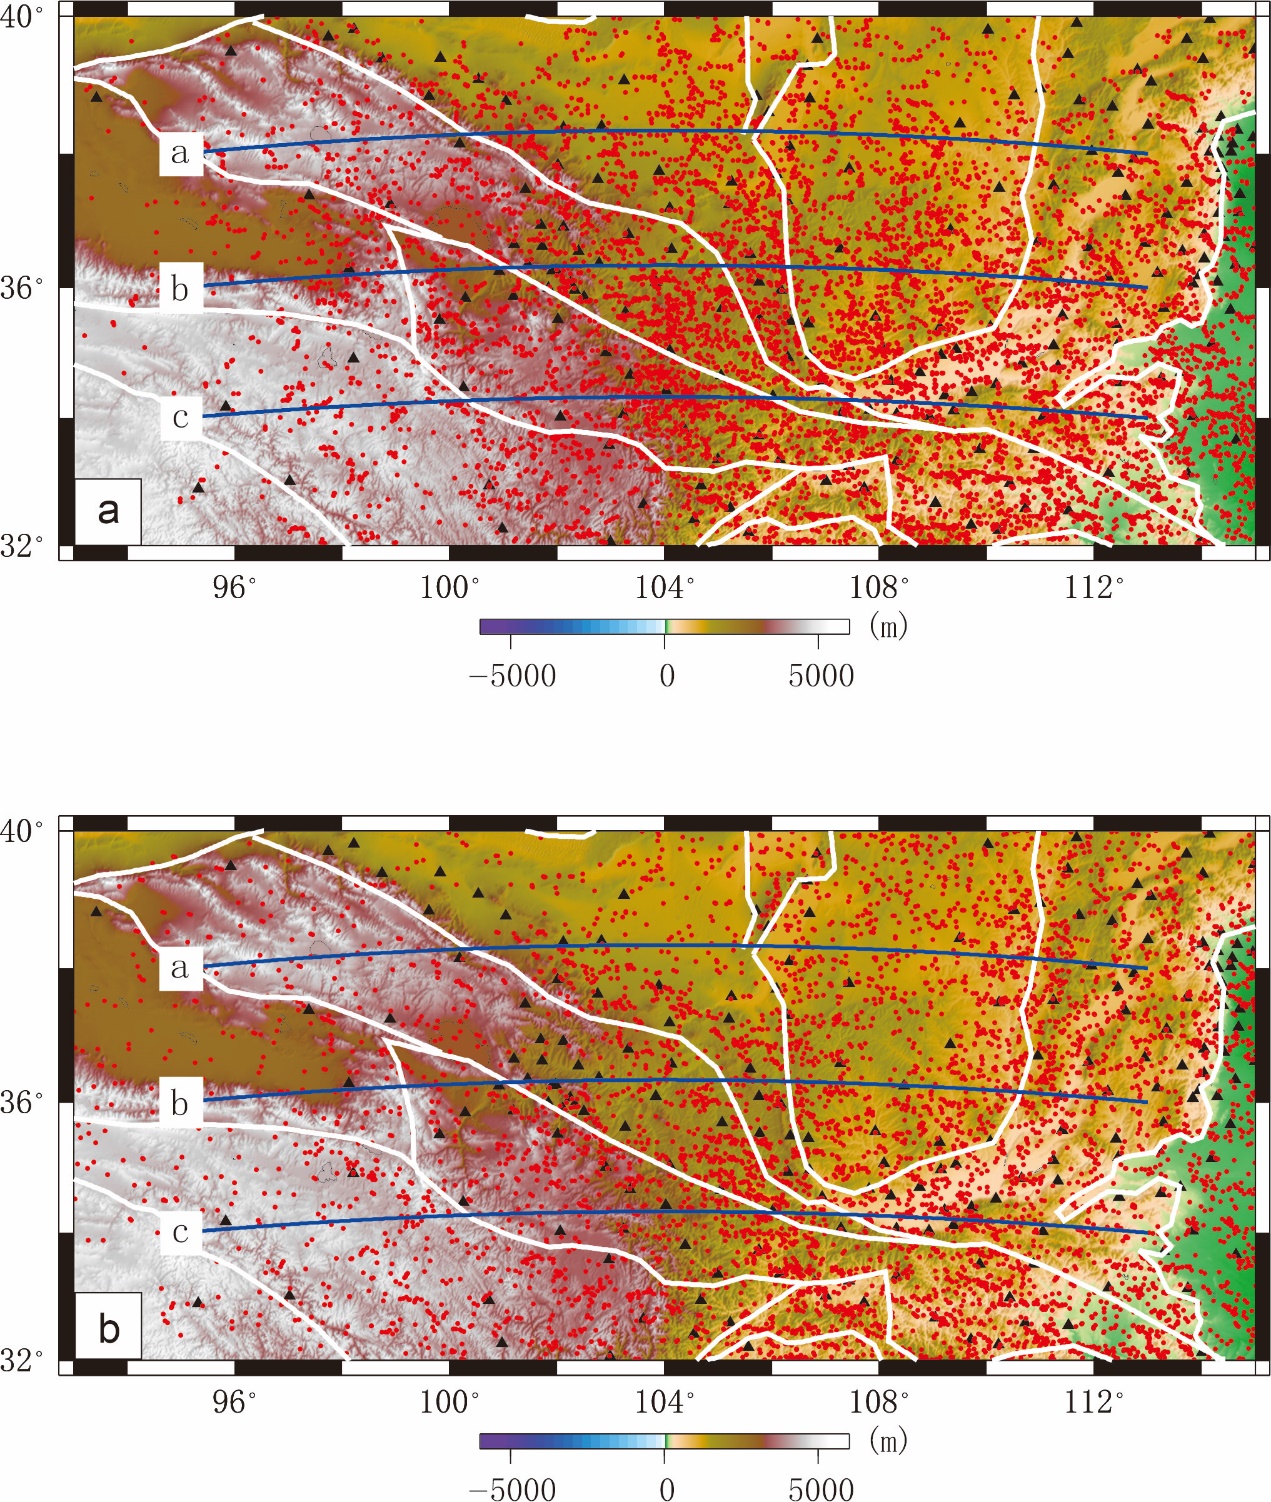


Fig. S2. Piercing points at depth of 410 km (a) and at depth of 660 km (b). Red points: piercing points at depths of 410 km and 660 km. Blue lines: profiles of P-wave velocity perturbation and CCP stacking profiles of receiver functions [the figure was generated by Chuansong He using Generic Mapping Tools (<https://www.generic-mapping-tools.org/)>].

**
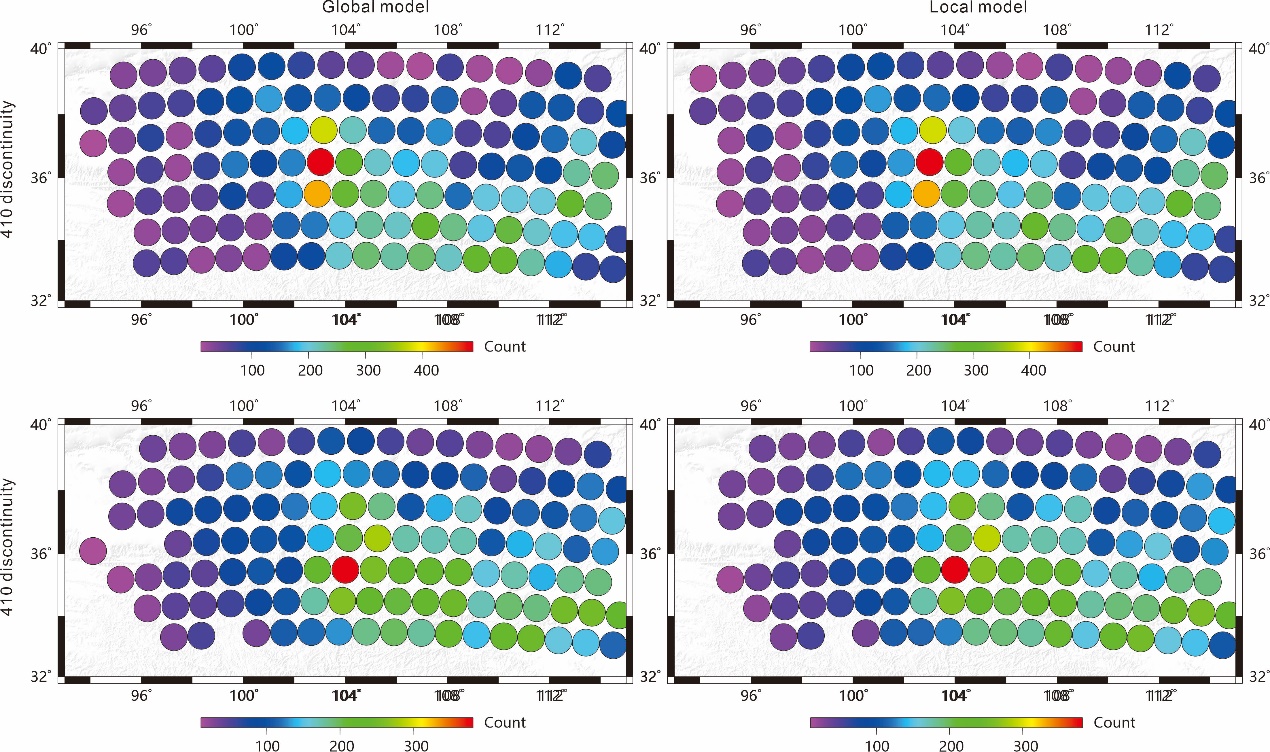
**

Fig. S3. Stacking points at 410 km and 660 km discontinuities [the figure was generated by Chuansong He using Generic Mapping Tools (<https://www.generic-mapping-tools.org/)>].


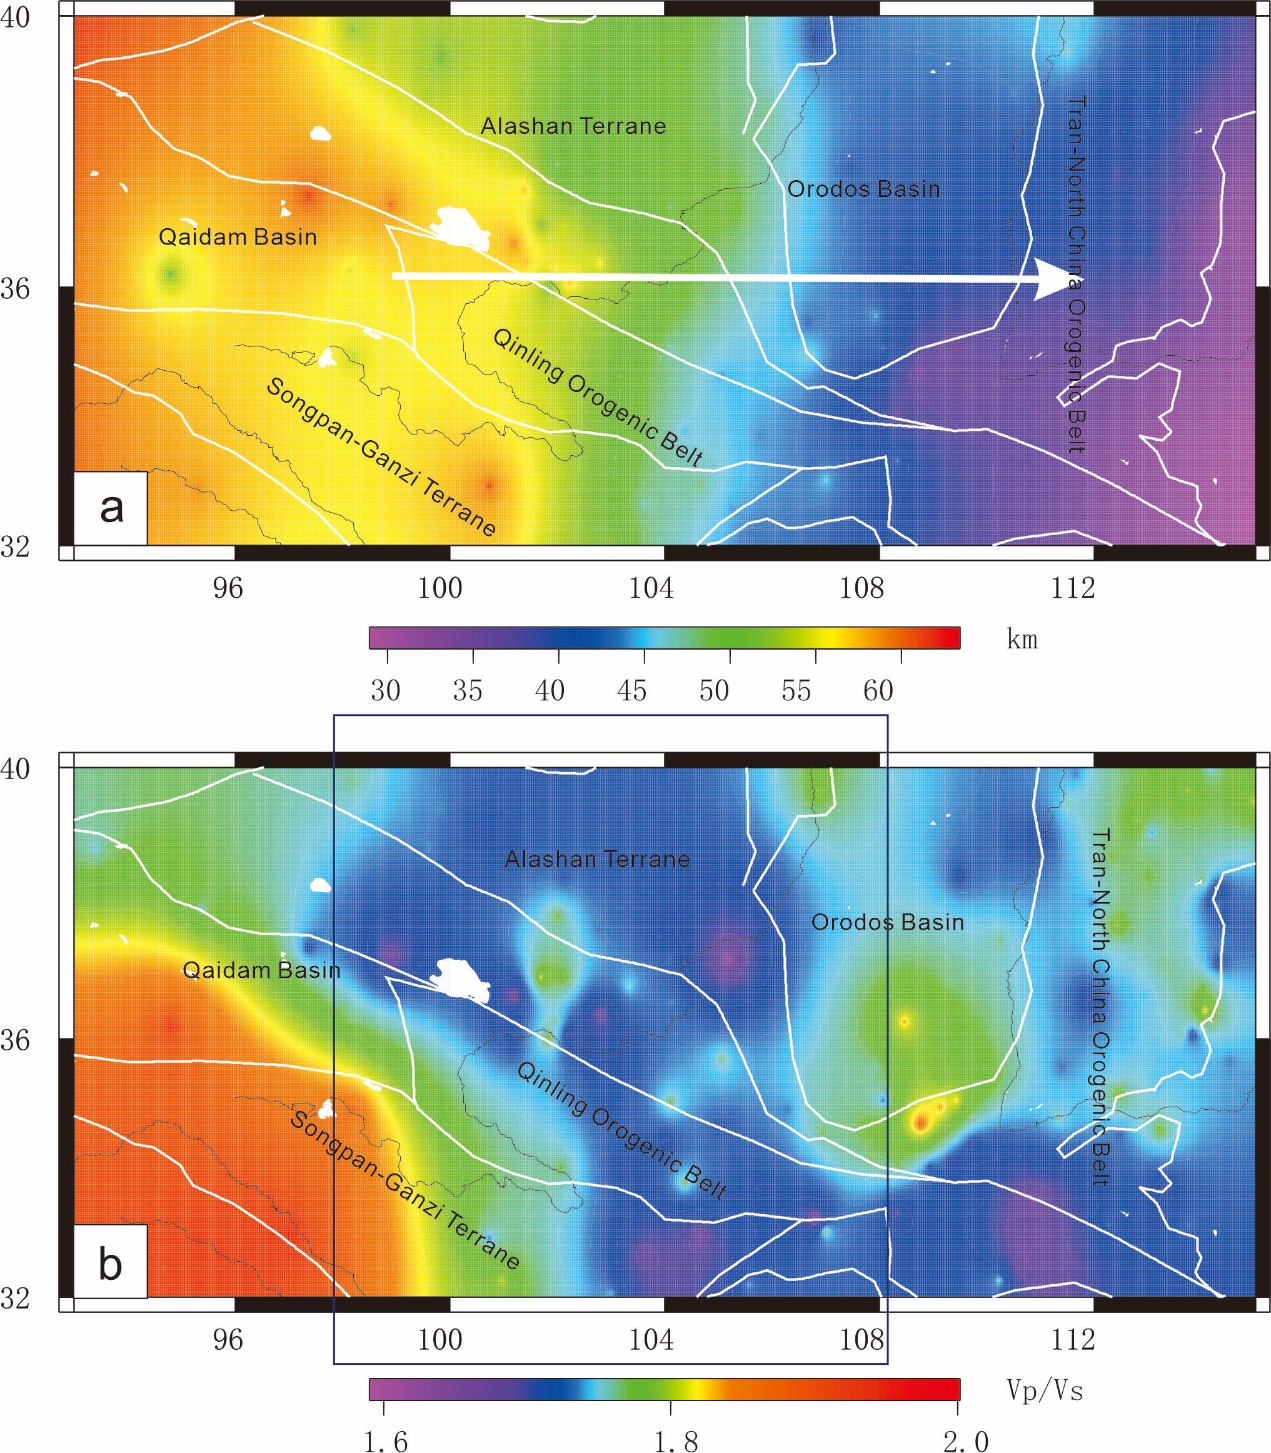


Fig. S4. Crustal thickness (a) and Vp/Vs ratio (b) in the northern part of the NSSZ. Yellow triangles: seismic stations. Lower Vp/Vs ratios in the northern part of the NSSZ are generated by a deep process of lithospheric delamination (He et al., 2014) [the figure was generated by Chuansong He using Generic Mapping Tools (<https://www.generic-mapping-tools.org/>)].


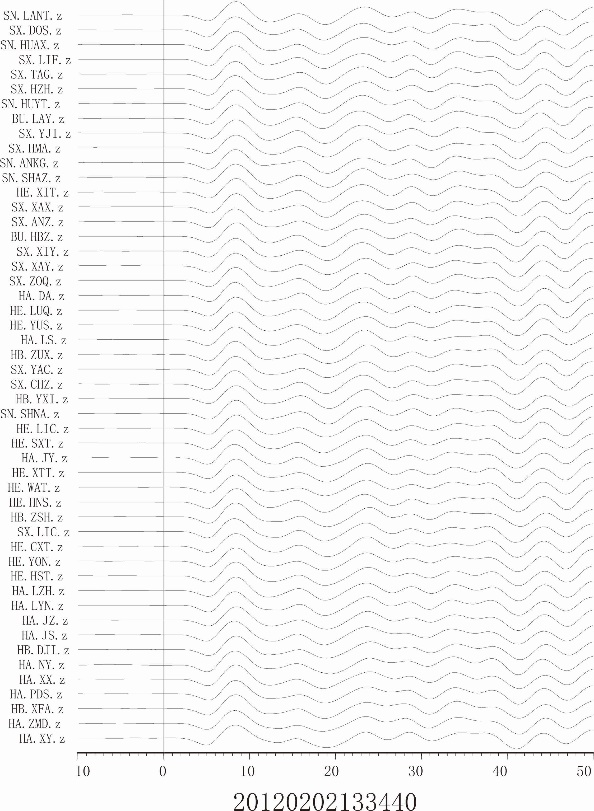


Fig. S5 Vertical component at each seismic station for the 20120202133440 event [the figure was generated by Chuansong He using Generic Mapping Tools (<https://www.generic-mapping-tools.org/>)].


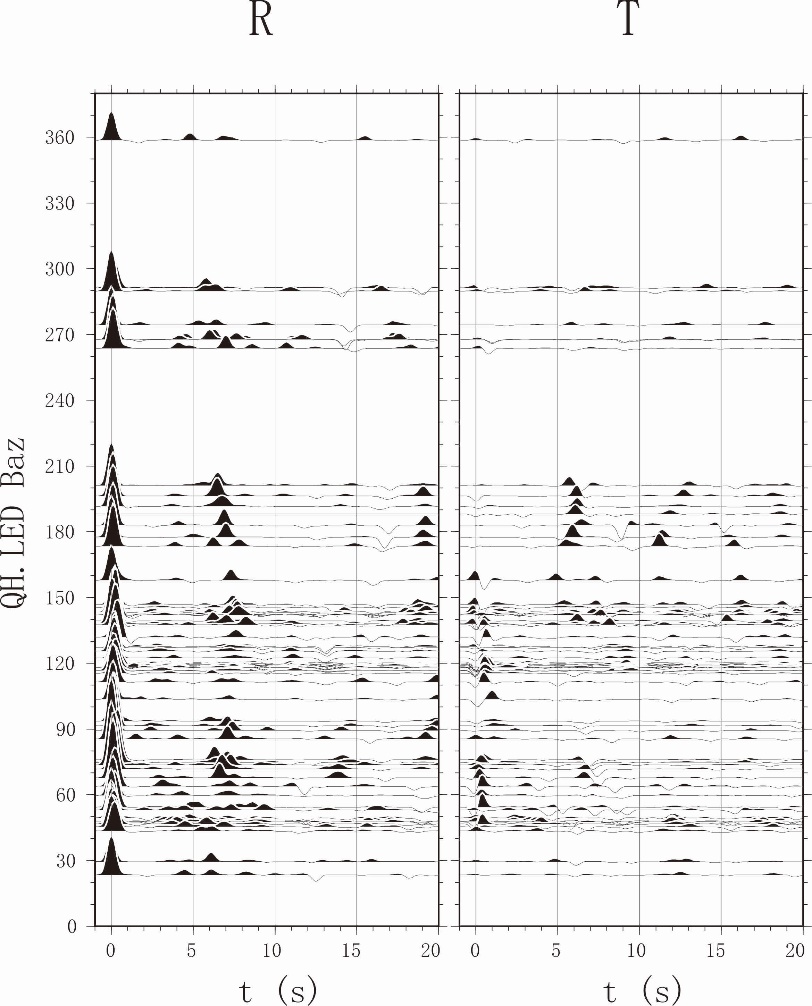


Fig. S6 R and T receiver functions for the QH.LED station [the figure was generated by Chuansong He using Generic Mapping Tools (<https://www.generic-mapping-tools.org/>)].
